# Supplementary material for: PET/Ag NW/PMMA transparent electromagnetic interference shielding films with high stability and flexibility
Source: Royal Society of Chemistry journal article supplement (doi:10.1039/d1nr00977j), 2021-01-01
Supplement: d1nr00977j1.pdf [file d1nr00977j1.pdf]

## Electronic Supplementary Information

### **PET/Ag NW/PMMA transparent electromagnetic interference shielding films with high stability and flexibility**

Xingzhong Zhu,<sup>a</sup> Aoqi Guo,<sup>a</sup> Zhiyang Yan,<sup>b,c</sup> Feng Qin,<sup>\*b,c</sup> Juan Xu,<sup>a</sup> Yanda Ji,<sup>a</sup> and Caixia Kan<sup>\*a</sup>

<sup>a</sup> College of Science, Nanjing University of Aeronautics and Astronautics, Nanjing 210016, China. E-mail: cxkan@nuaa.edu.cn

<sup>b</sup> Institute of Applied Electronics, China Academy of Engineering Physics, Mianyang 621900, China. E-mail: fq\_soul2000@163.com

<sup>c</sup> Key Laboratory of Science and Technology on Complex Electromagnetic Environment, China Academy of Engineering Physics, Mianyang 621900, China

#### **Supplementary figure**

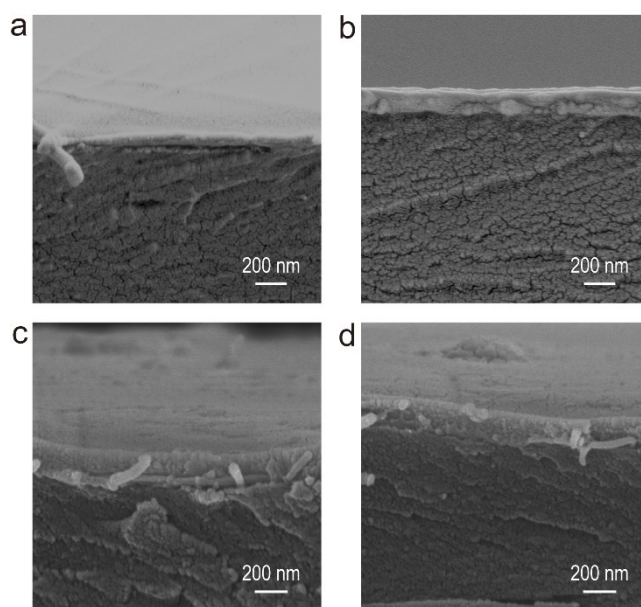

**Fig. S1** The cross-sectional SEM images of the PET/Ag NW/PMMA FTCEs with 5, 10, 15 and 20 wt% PMMA, respectively.

## Supplementary tables

**Table S1** The transmittances of PET/Ag NW/PMMA FTCFs with different concentrations of PMMA.

| PMMA (wt%) | Thickness (nm) | Transmittance before PMMA (%) | Transmittance after PMMA (%) |
|------------|----------------|-------------------------------|------------------------------|
| 5          | 60             | 95.7                          | 96.1                         |
| 10         | 140            |                               | 96.8                         |
| 15         | 170            |                               | 96.5                         |
| 20         | 210            |                               | 96.6                         |

**Table S2** The performance of PET/Ag NW/PMMA FTCFs.

| Area densities (mg/m <sup>2</sup> ) | Sheet resistance ( $\Omega$ /sq) | Transmittance (%) |
|-------------------------------------|----------------------------------|-------------------|
| 178                                 | 7                                | 89.5              |
| 161                                 | 10                               | 91.3              |
| 134                                 | 15                               | 93.3              |
| 78                                  | 21                               | 95.6              |
| 73                                  | 31                               | 96.2              |
| 67                                  | 39                               | 97.2              |
| 62                                  | 50                               | 97.7              |
| 53                                  | 82                               | 98                |
| 45                                  | 98                               | 99.2              |
| 36                                  | 112                              | 99.7              |
